# Supplementary material
Source: publisher site journal article supplement (https://www.dovepress.com/article/467949)
Supplement: Supplementary file 1 [file get_supplementary_file.php]

**Supporting Information**

**Supporting Figures**


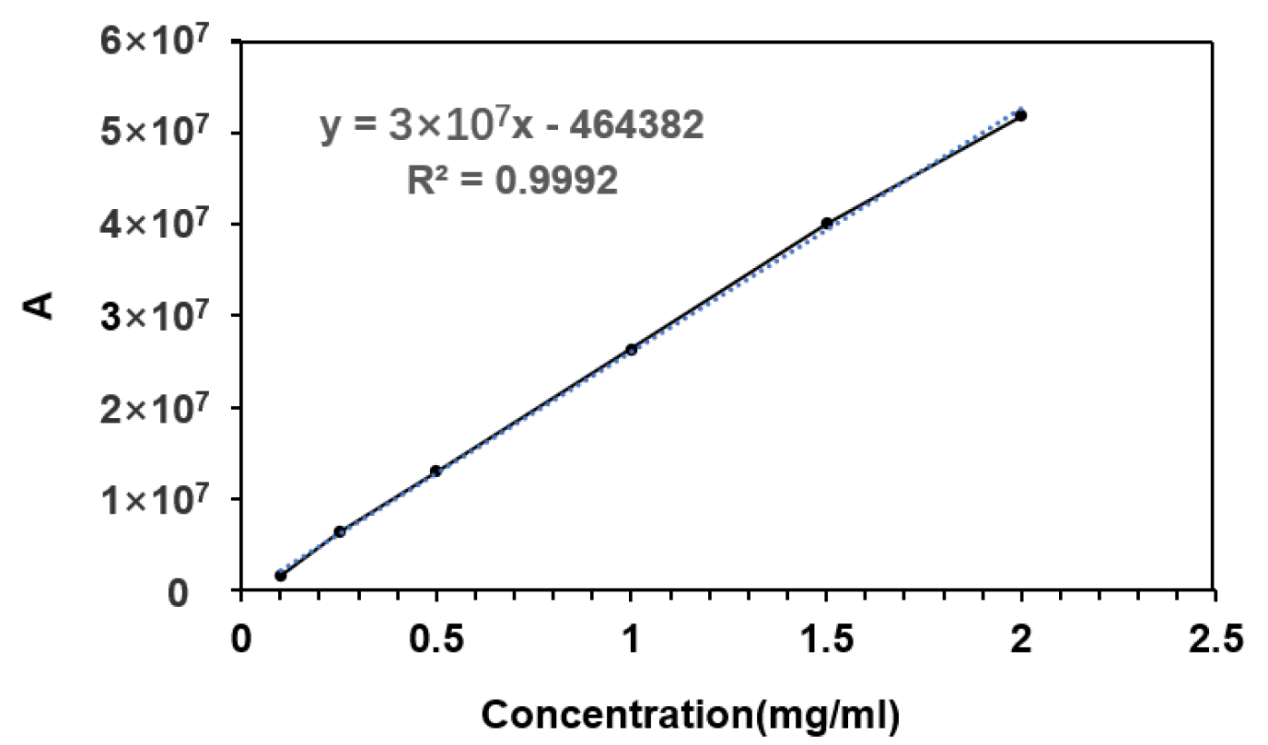


**Figure S1.** The Standard curve of DOX. A represents the peak area at 480 nm and C represents the corresponding concentration.


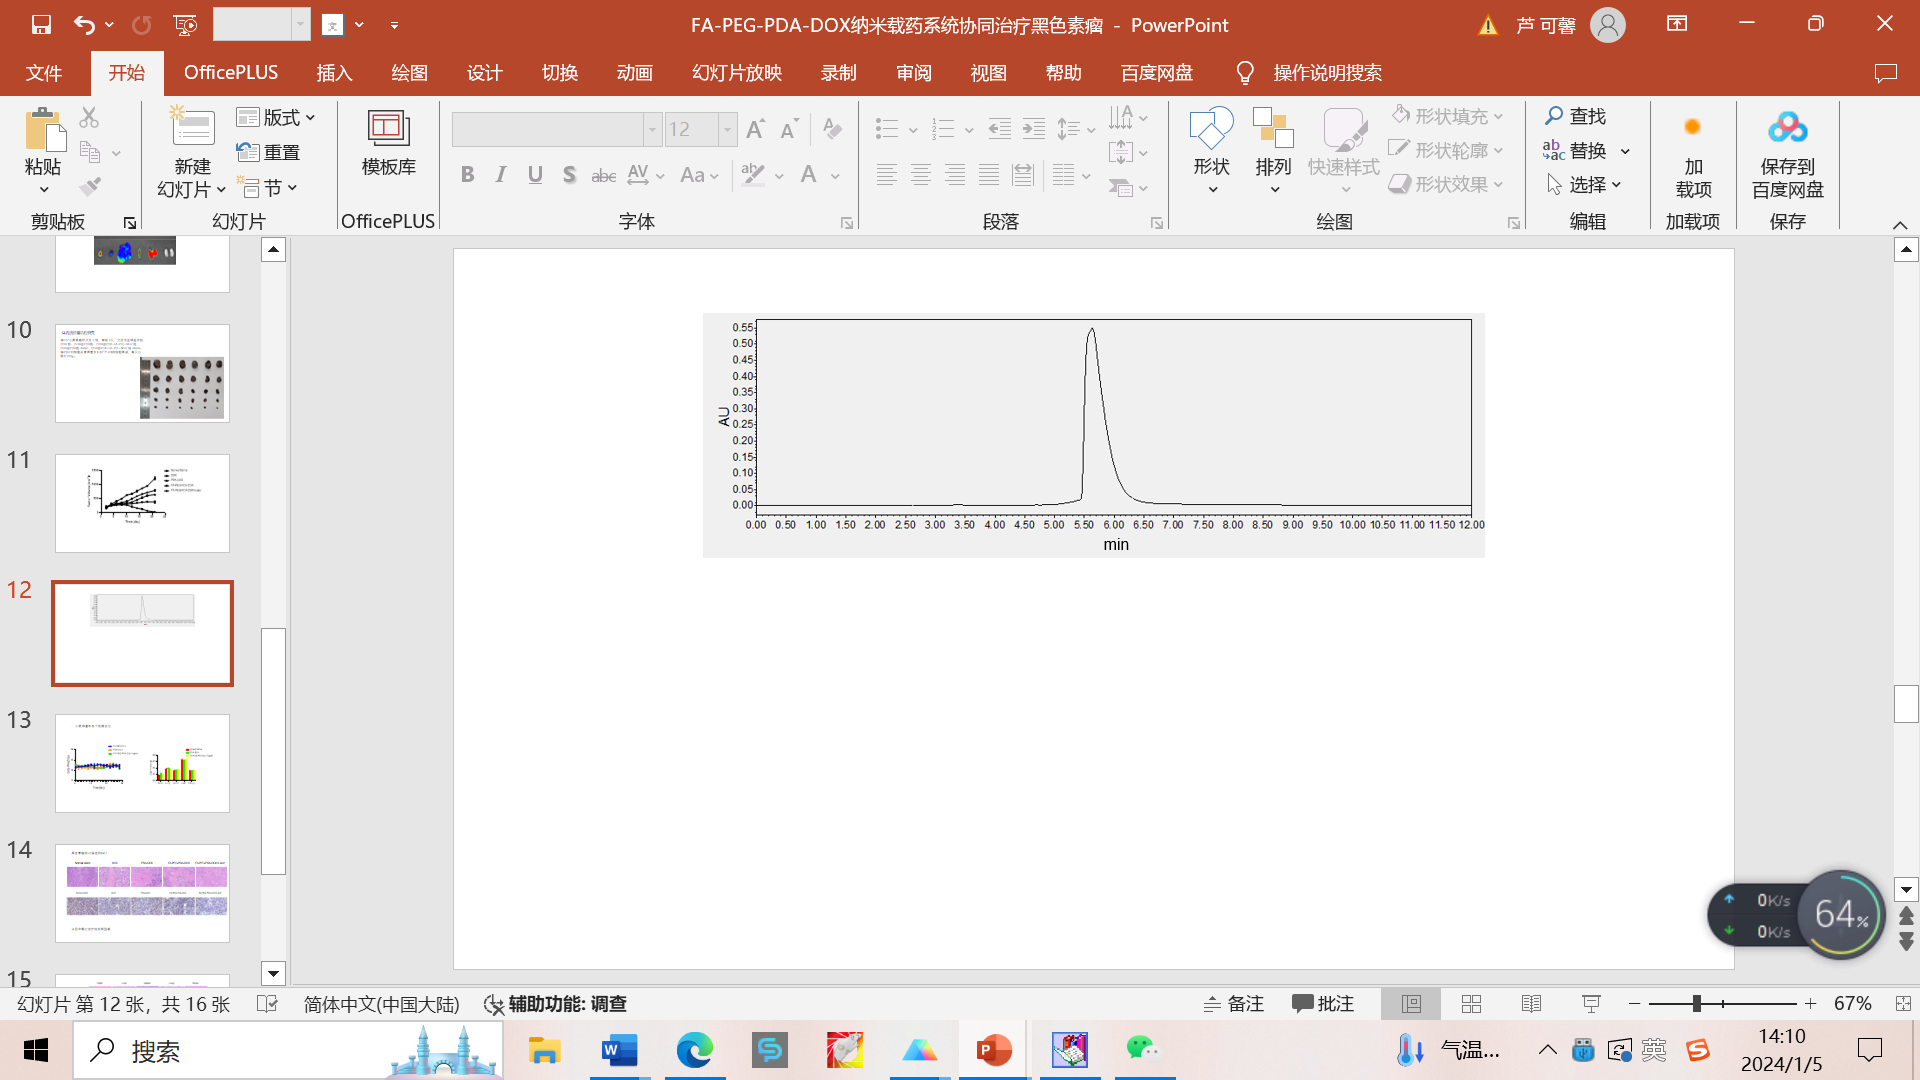


**Figure S2.** Absorption of the loading DOX in PDA-DOX at 480 nm.


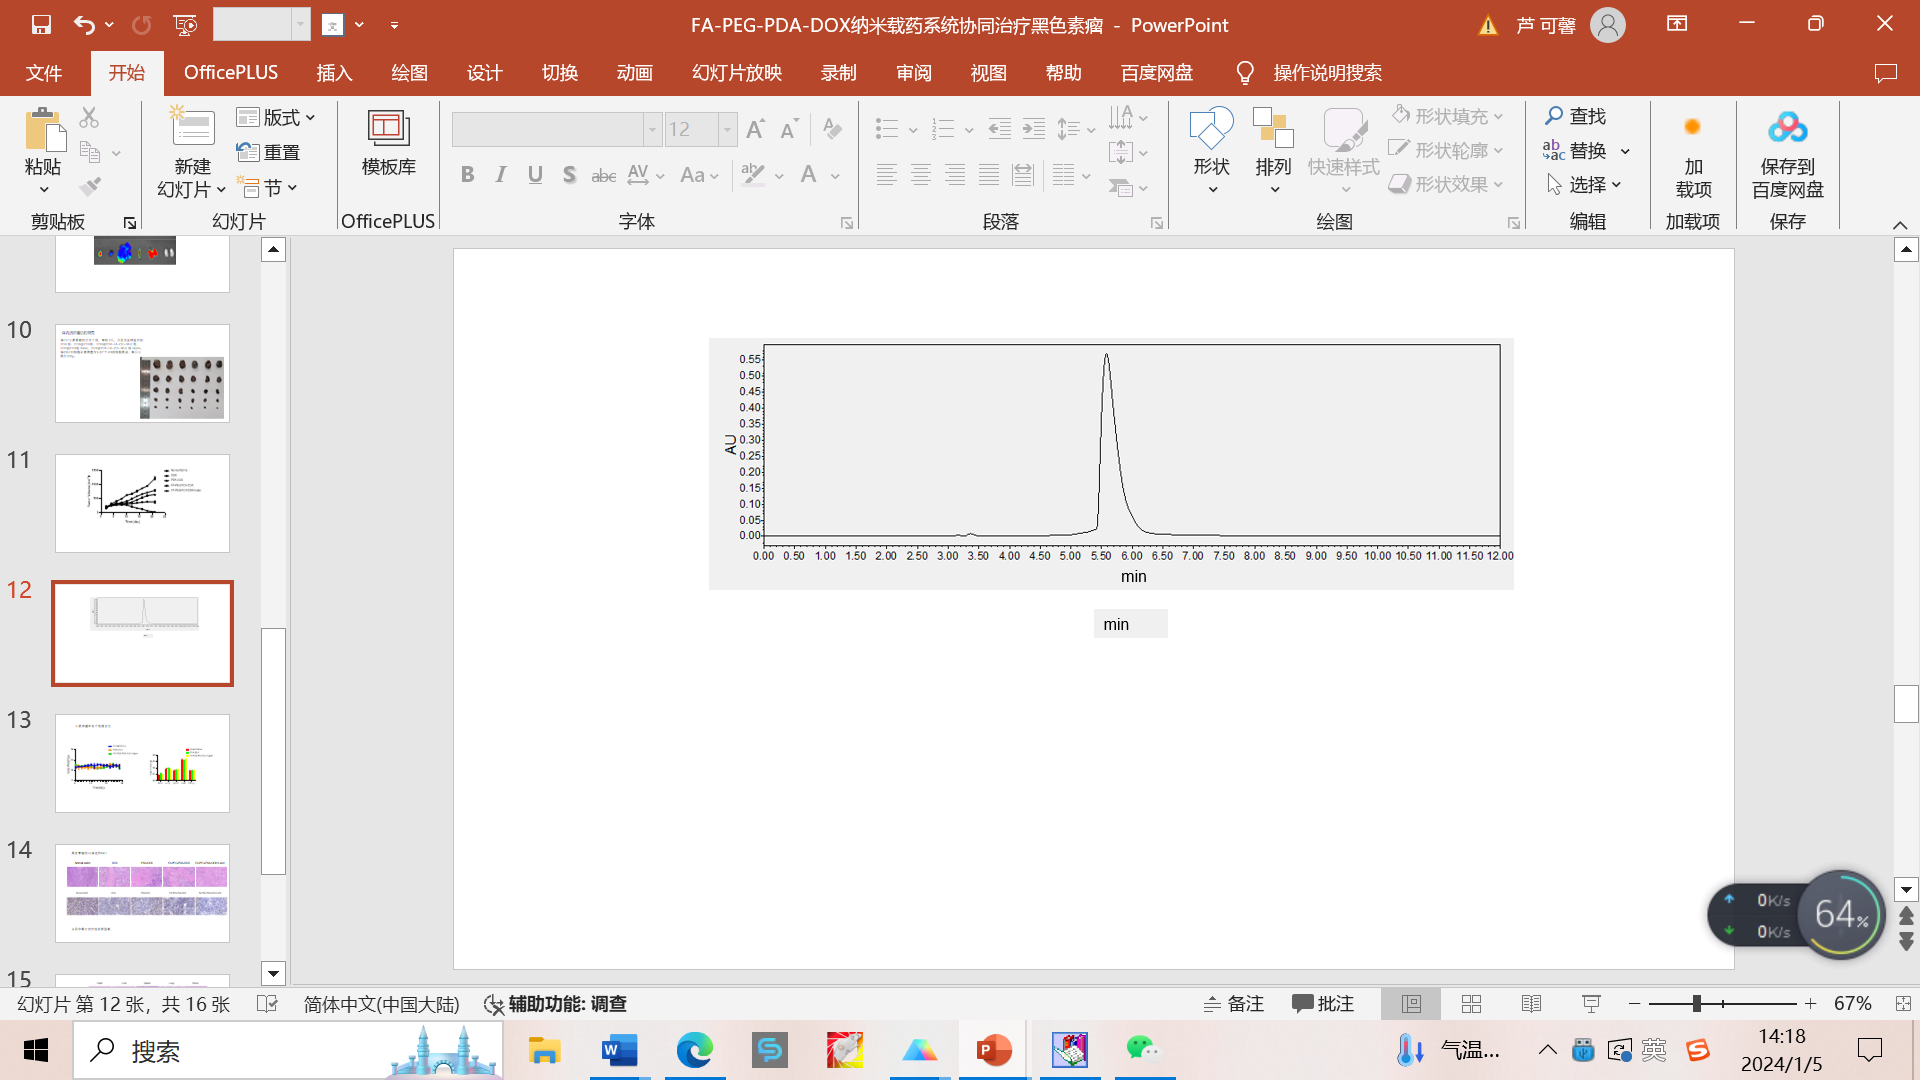


**Figure S3**. Absorption of the loading DOX in FA-PEG-PDA-DOX at 480 nm


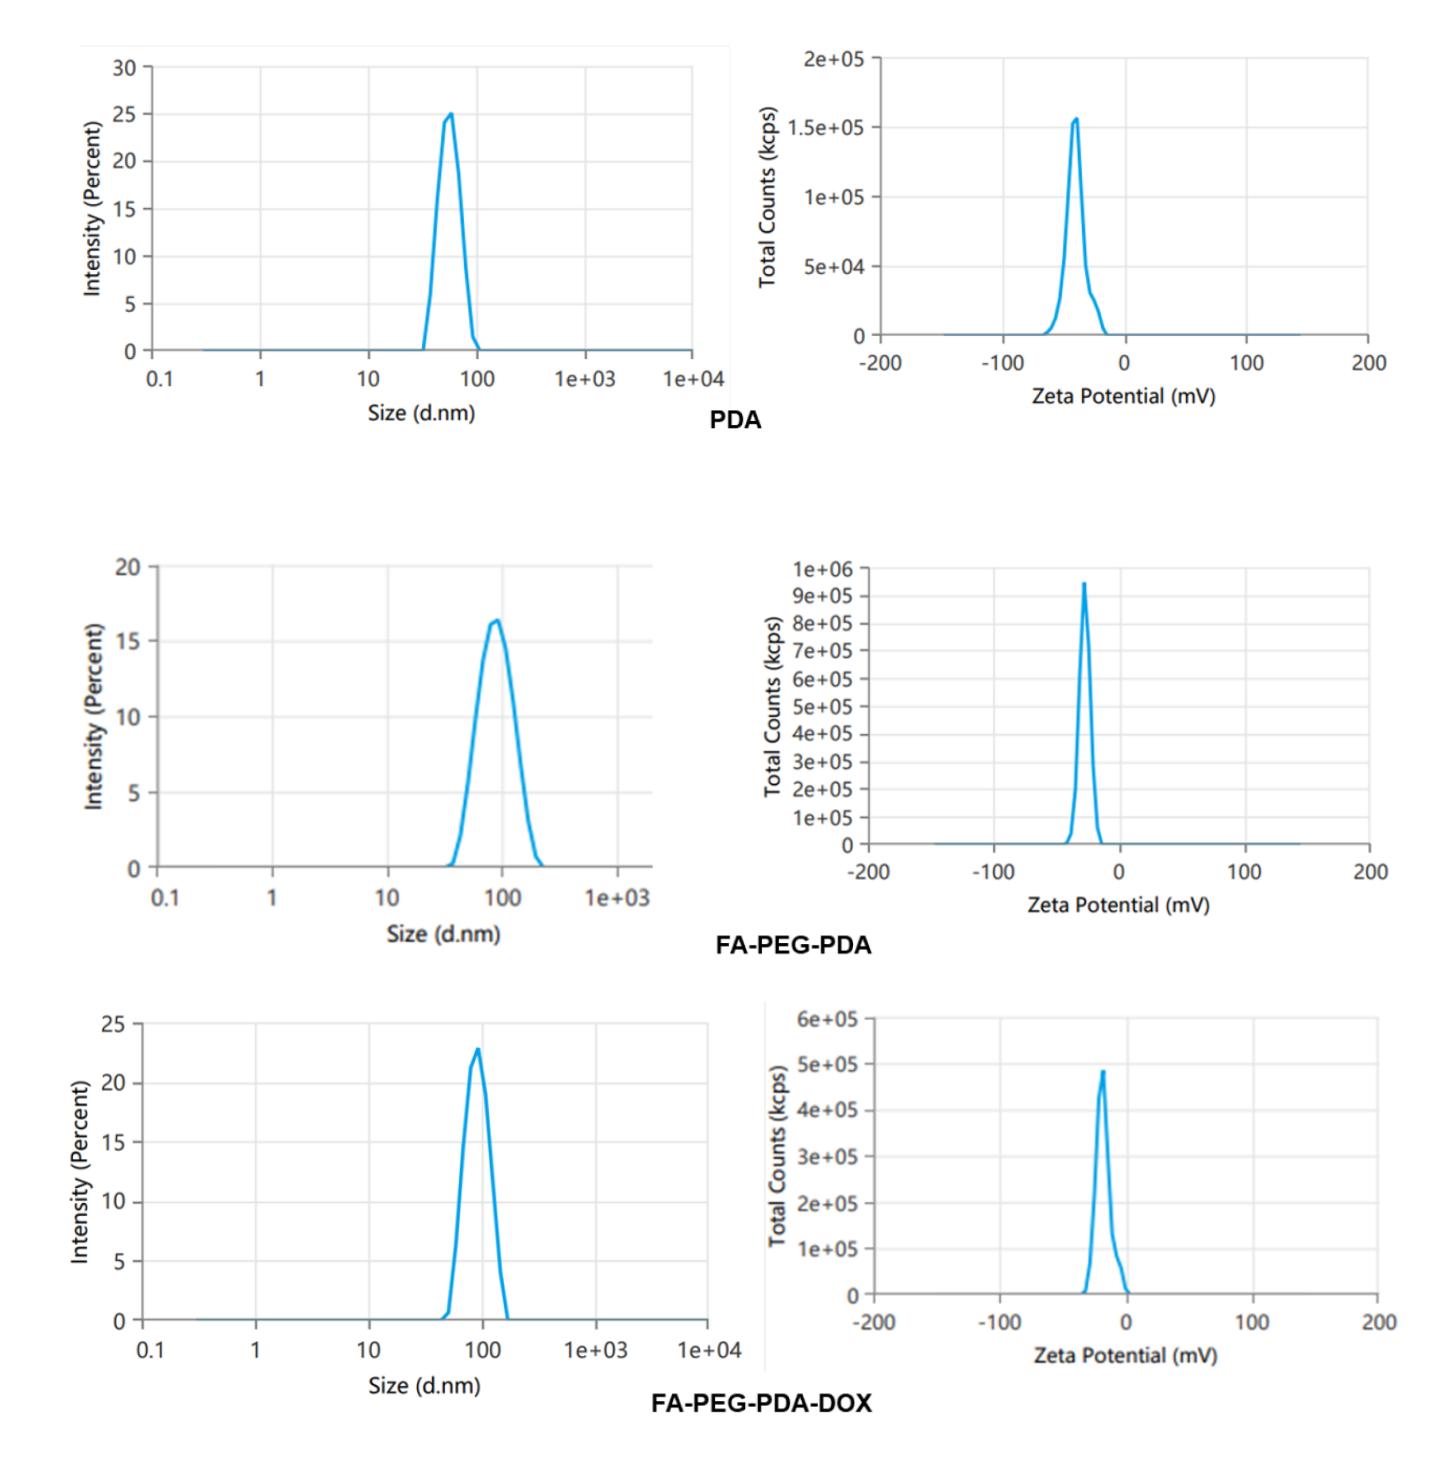


**Figure S4.** Size and zeta potential test of three NPs


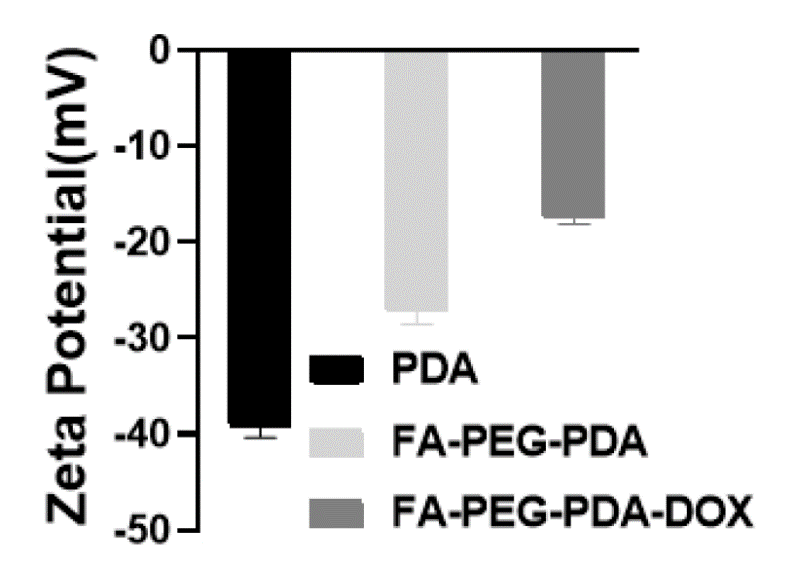


**Figure S5.** Zeta potential analysis of three NPs


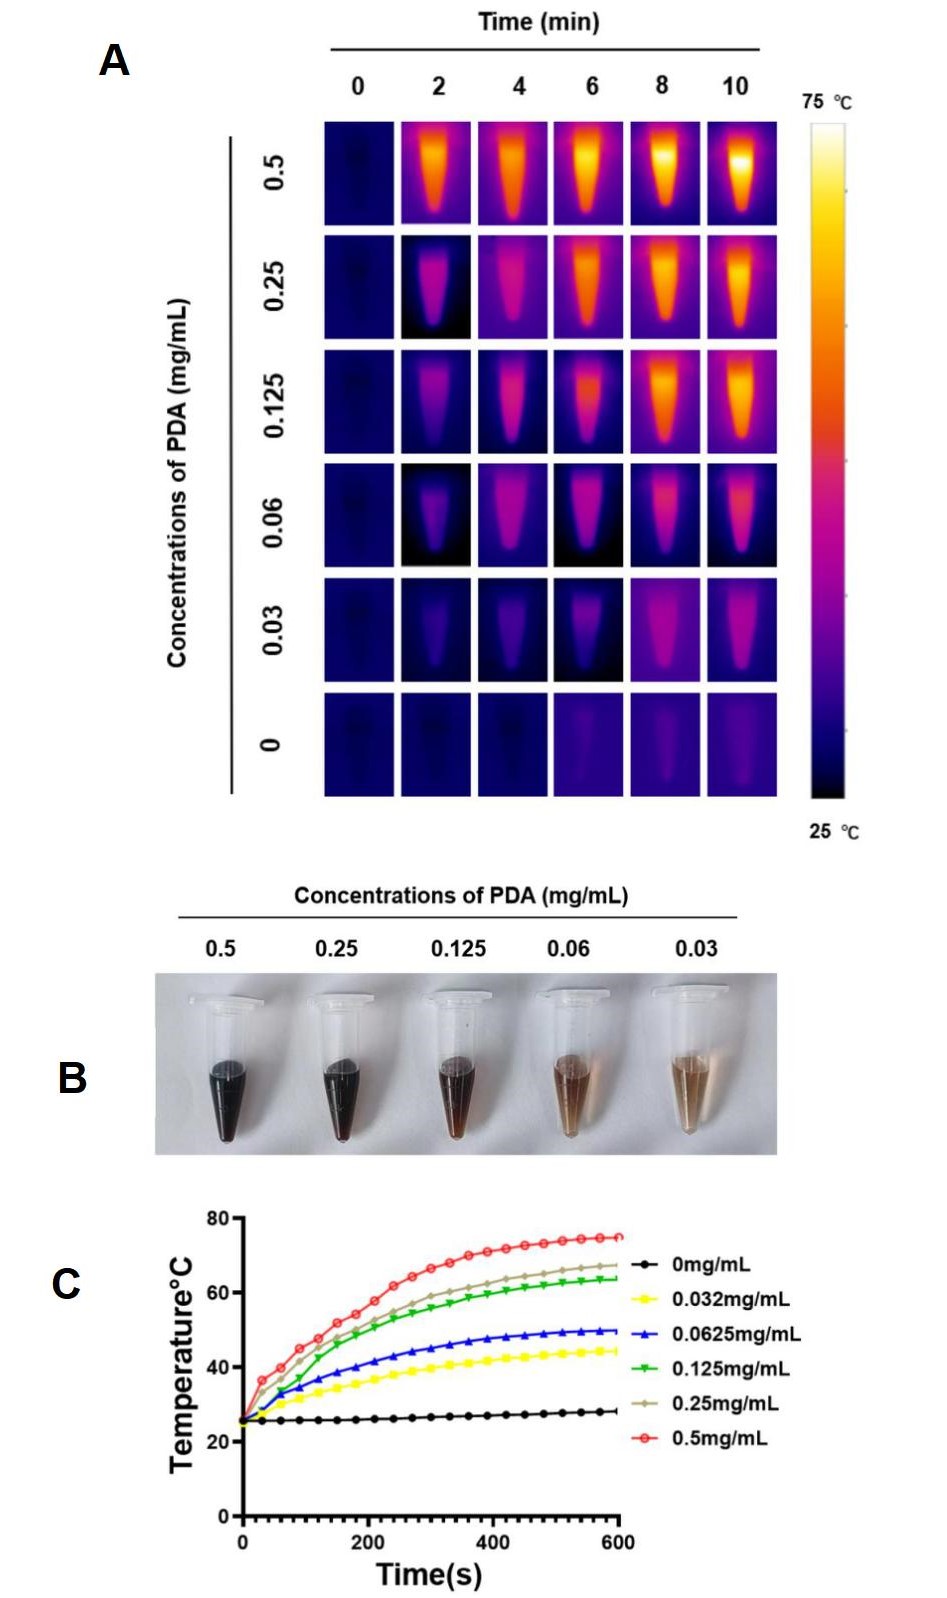


**Figure S6.** (A) Infrared thermal images of PDA. (B) PDA nanoparticles in different concentrations. (C)Concentration-dependent photothermal heating curves of PDA.


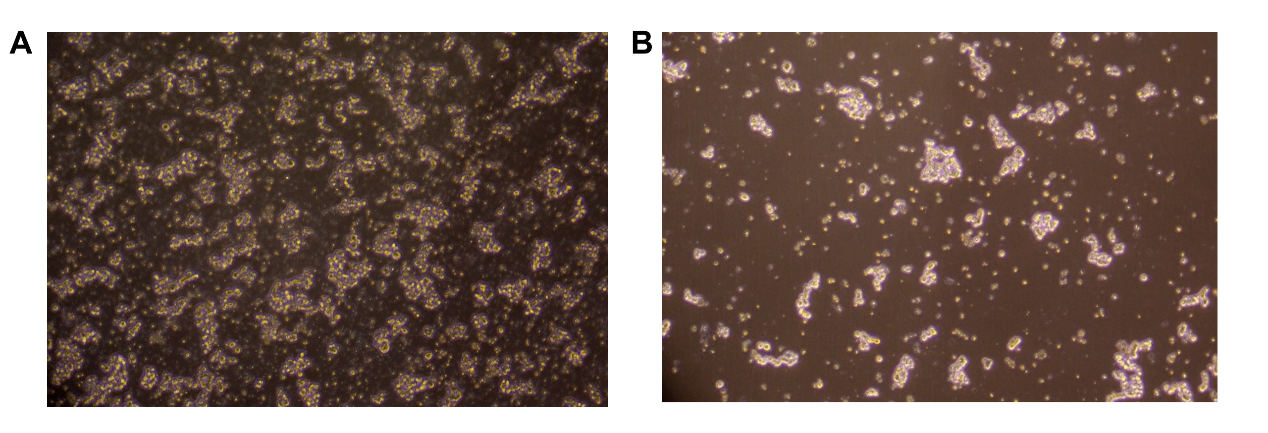


**Figure S7.** Microscopy images of the Y79 cells with control group (a) and FA-PEG-PDA-DOX＋Laser group for 48 h.
